# Supplementary material for: Adsorption of HCN on cosmic silicates: a periodic quantum mechanical study
Source: Royal Society of Chemistry journal article supplement (doi:10.1039/d3cp01459b), 2023-01-01
Supplement: d3cp01459b1.pdf [file d3cp01459b1.pdf]

## Electronic Supplementary Information

### Adsorption of HCN on cosmic silicates: a periodic quantum mechanical study

Niccolò Bancone<sup>1,2</sup>, Stefano Pantaleone<sup>1</sup>, Piero Ugliengo<sup>1</sup>, Albert Rimola<sup>2\*</sup> and Marta Corno<sup>1\*</sup>

<sup>1</sup>Dipartimento di Chimica and NIS – Nanostructured Interfaces and Surfaces – Centre, Università degli Studi di Torino, via P. Giuria 7, 10125, Torino, Italy

<sup>2</sup>Departament de Química, Universitat Autònoma de Barcelona, 08193 Bellaterra, Spain

\*Corresponding authors: [marta.corno@unito.it](mailto:marta.corno@unito.it), telephone: +390116702439  
[albert.rimola@uab.cat](mailto:albert.rimola@uab.cat), telephone:+34935812164

## Computational Details

### *Basis set*

Here follow the adopted basis sets for forsterite atoms (Mg, O, Si, taken by Bruno's)<sup>1</sup> and the polarized Ahlrichs-VTZ<sup>2</sup> for HCN atoms (CRYSTAL17 format):

Mg

```
12 5
0 0 8 2.0 1.0
68371.8750000      0.0002226
9699.3400900      0.0018982
2041.1767860      0.0110451
529.8629060      0.0500627
159.1860000      0.1691230
54.6848000      0.3670310
21.2357000      0.4004100
8.7460400      0.1498700
0 1 5 8.0 1.0
156.7950000      -0.0062400      0.0077200
31.0339000      -0.0788200      0.0642700
9.6453000      -0.0799200      0.2104000
3.7109000      0.2906300      0.3431400
1.6116400      0.5716400      0.3735000
0 1 1 2.0 1.0
```

|               |           |           |
|---------------|-----------|-----------|
| 0.6800000     | 1.0000000 | 1.0000000 |
| 0 1 1 0.0 1.0 |           |           |
| 0.2245160     | 1.0000000 | 1.0000000 |
| 0 3 1 0.0 1.0 |           |           |
| 0.5000000     | 1.0000000 |           |

Si

14 6

|               |            |            |
|---------------|------------|------------|
| 0 0 8 2.0 1.0 |            |            |
| 87645.8000000 | 0.0002370  |            |
| 12851.8000000 | 0.0019200  |            |
| 2786.2800000  | 0.0109000  |            |
| 728.0430000   | 0.0496000  |            |
| 219.5160000   | 0.1668000  |            |
| 75.9006000    | 0.3630000  |            |
| 29.4602000    | 0.4051000  |            |
| 11.9891000    | 0.1504000  |            |
| 0 1 6 8.0 1.0 |            |            |
| 165.9580000   | -0.0088400 | 0.0090900  |
| 39.3727000    | -0.0859000 | 0.0601000  |
| 12.7112000    | -0.0712000 | 0.1952000  |
| 4.7177000     | 0.4147000  | 0.3384000  |
| 1.8482000     | 0.6168000  | 0.3006000  |
| 0.7365000     | 0.1154000  | 0.0648000  |
| 0 1 3 4.0 1.0 |            |            |
| 4.1752000     | -0.0199000 | -0.0087000 |
| 1.4472000     | -0.1864000 | -0.0043800 |
| 0.5023000     | 0.0967000  | 0.2207000  |
| 0 1 1 0.0 1.0 |            |            |
| 0.3220000     | 1.0000000  | 1.0000000  |
| 0 1 1 0.0 1.0 |            |            |
| 0.1300000     | 1.0000000  | 1.0000000  |
| 0 3 1 0.0 1.0 |            |            |
| 0.6000000     | 1.0000000  |            |

O

8 5

|             |         |
|-------------|---------|
| 0 0 8 2. 1. |         |
| 8020.       | 0.00108 |
| 1338.       | 0.00804 |
| 255.4       | 0.05324 |
| 69.22       | 0.1681  |
| 23.90       | 0.3581  |
| 9.264       | 0.3855  |
| 3.851       | 0.1468  |
| 1.212       | 0.0728  |

0 1 4 6. 1.  
 49.43 -0.00883 0.00958  
 10.47 -0.0915 0.0696  
 3.235 -0.0402 0.2065  
 1.217 0.379 0.347  
 0 1 1 0.0 1.0  
 0.59 1. 1.  
 0 1 1 0. 1.  
 0.250588 1. 1.  
 0 3 1 0. 1.  
 0.500 1.

## H

1 4  
 0 0 3 1.0 1.00  
 34.0613410 0.60251978E-02  
 5.1235746 0.45021094E-01  
 1.1646626 0.20189726  
 0 0 1 0. 1.00  
 0.32723041 1.0000000  
 0 0 1 0. 1.00  
 0.10307241 1.0000000  
 0 2 1 0. 1.  
 0.8 1.0000000

## C

6 10  
 0 0 5 2.0 1.0  
 8506.0384000 0.53373664E-03  
 1275.7329000 0.41250232E-02  
 290.3118700 0.21171337E-01  
 82.0562000 0.82417860E-01  
 26.4796410 0.24012858  
 0 0 1 2.0 1.0  
 9.2414585 1.0000000  
 0 0 1 0.0 1.0  
 3.3643530 1.0000000  
 0 0 1 0.0 1.0  
 0.87174164 1.0000000  
 0 0 1 0.0 1.0  
 0.36352352 1.0000000  
 0 0 1 0.0 1.0  
 0.12873135 1.0000000  
 0 2 4 2.0 1.0  
 34.7094960 0.53300974E-02

7.9590883 0.35865814E-01  
 2.3786972 0.14200299  
 0.81540065 0.34203105  
 0 2 1 0.0 1.0  
 0.28953785 1.0000000  
 0 2 1 0.0 1.0  
 0.10084754 1.0000000  
 0 3 1 0.0 1.0  
 0.8000000 1.0000000

N

7 10  
 0 0 5 2.0 1.00  
 11913.4167560 -0.52297017365E-03  
 1786.7213834 -0.40428404036E-02  
 406.59012834 -0.20772715125E-01  
 114.92525065 -0.81183137849E-01  
 37.105883422 -0.23871497395  
 0 0 1 2.0 1.00  
 12.971676198 1.0000000  
 0 0 1 0.0 1.00  
 4.7302291164 1.0000000  
 0 0 1 0.0 1.00  
 1.2525184258 1.0000000  
 0 0 1 0.0 1.00  
 0.51260071231 1.0000000  
 0 0 1 0.0 1.00  
 0.17939714002 1.0000000  
 0 2 4 3.0 1.00  
 49.218758392 0.55526953476E-02  
 11.348935304 0.38054617957E-01  
 3.4285088246 0.14941412242  
 1.1799512559 0.34898187368  
 0 2 1 0.0 1.00  
 0.41726122577 1.0000000  
 0 2 1 0.0 1.00  
 0.14295131280 1.0000000  
 0 3 1 0.0 1.00  
 1.0000000 1.0000000

## Results

### *HCN adducts on forsterite surfaces*

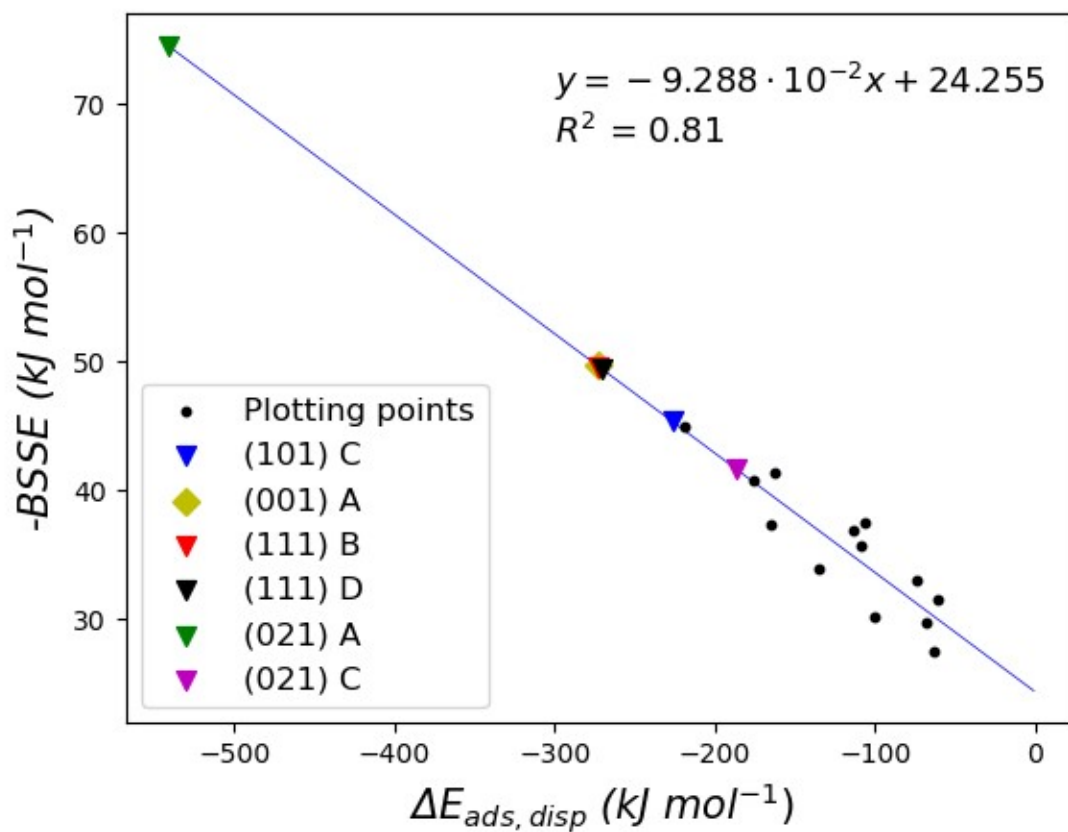

Figure S1. Linear dependence between  $\Delta E_{ads,disp}$  and corresponding BBSE values. The interpolated points represent the structures for which the CP method was not feasible.

Here follow all the structures of the studied HCN adducts on forsterite surfaces

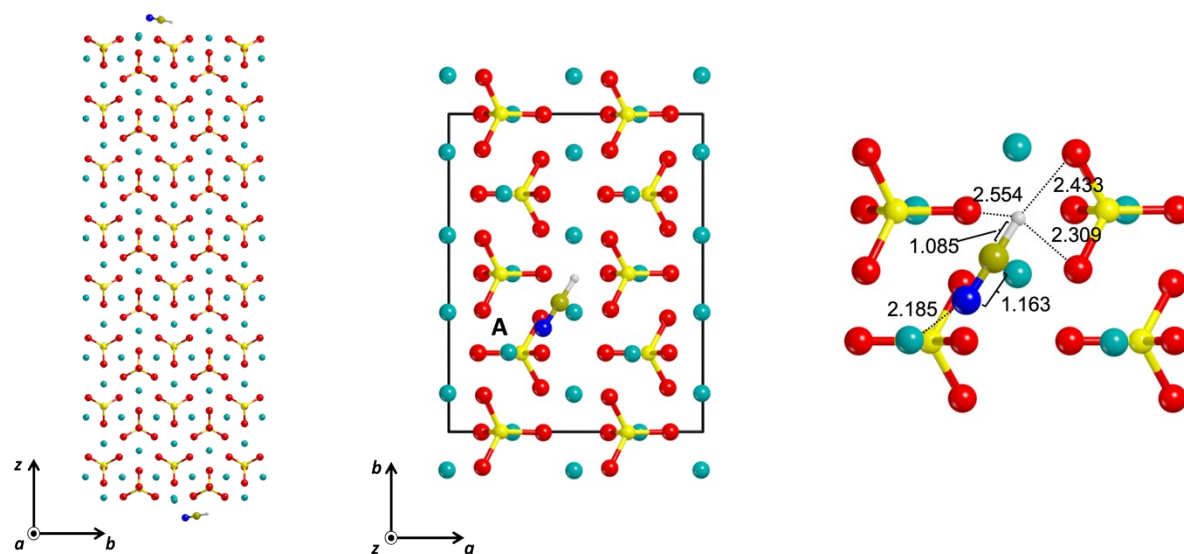

Figure S2. Side and top views of the (010) A structure.

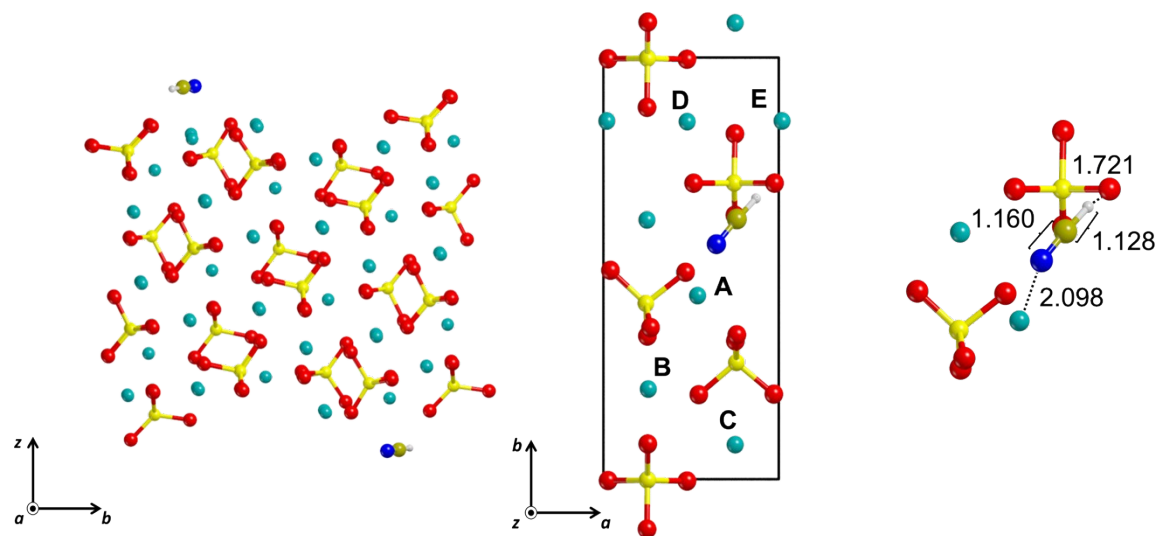

Figure S3. Side and top views of the (120) A structure.

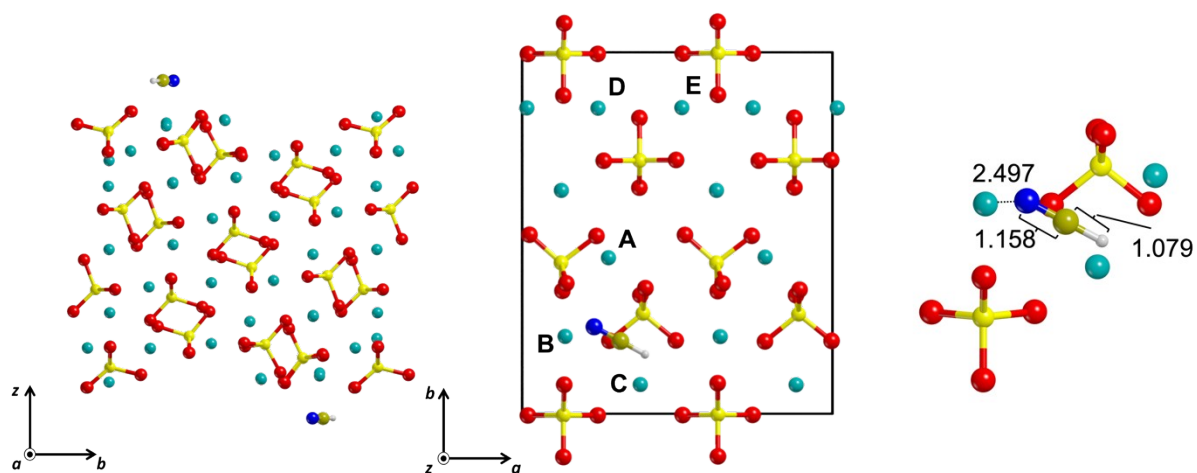

Figure S4. Side and top views of the (120) B structure.

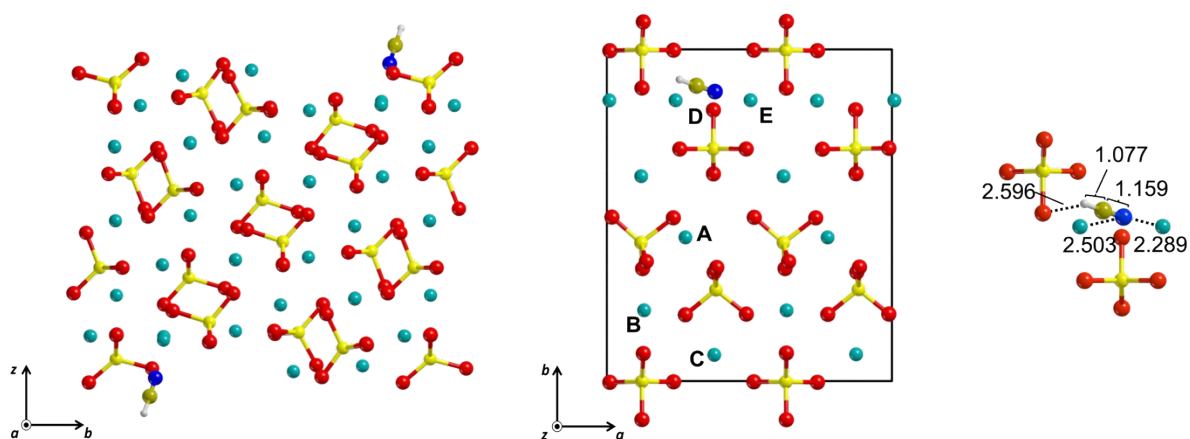

Figure S5. Side and top views of the (120) C structure. After initially placing the molecule on the C site, it displaced towards the D and E sites during the geometry optimization. The same structure was obtained by placing the HCN molecule on D and E sites.

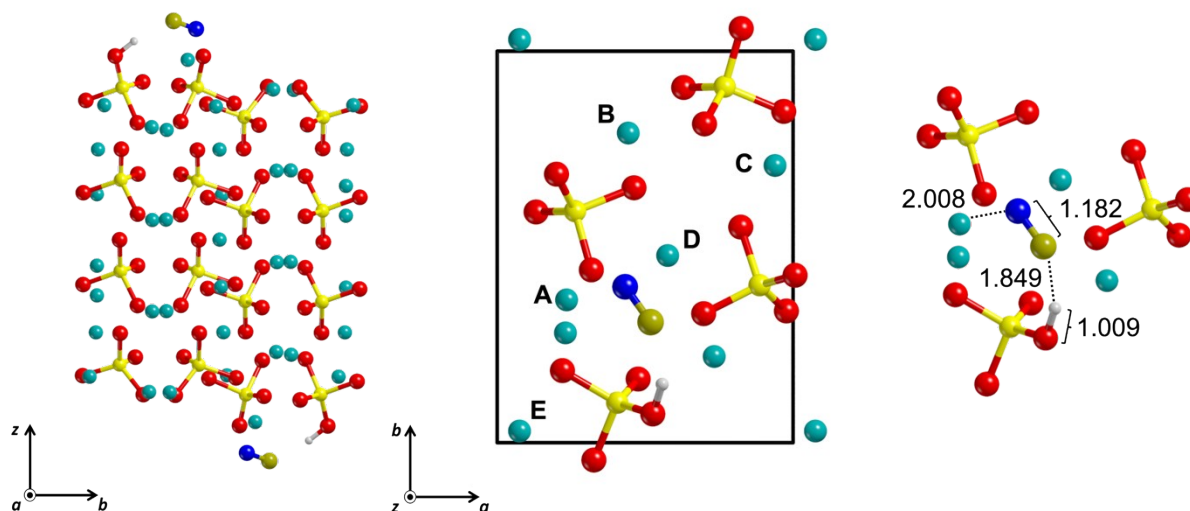

Figure S6. Side and top views of the (101) A structure. The same structure was obtained by placing the HCN molecule on the D site.

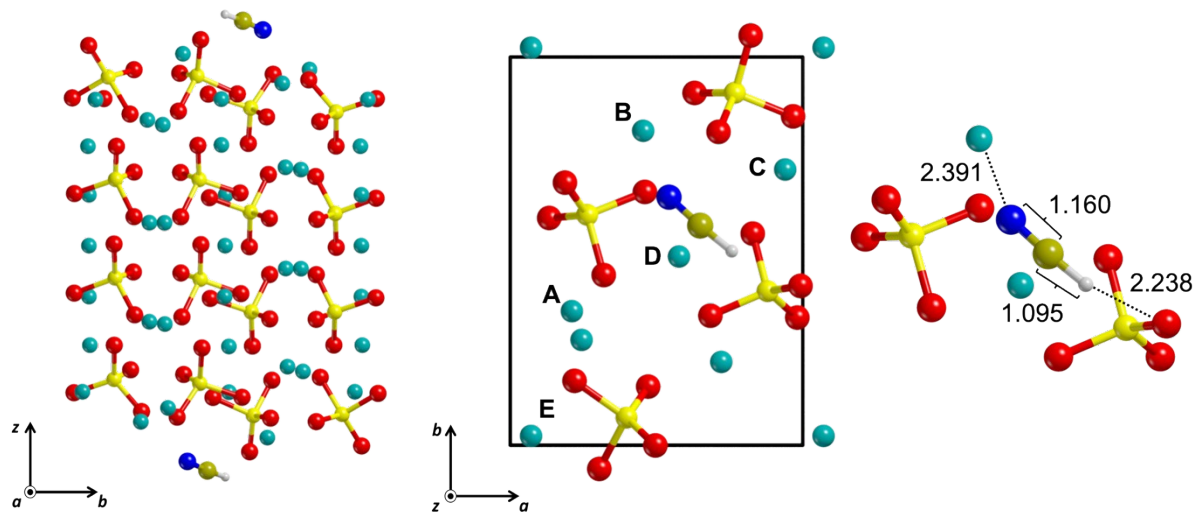

Figure S7. Side and top views of the (101) B structure.

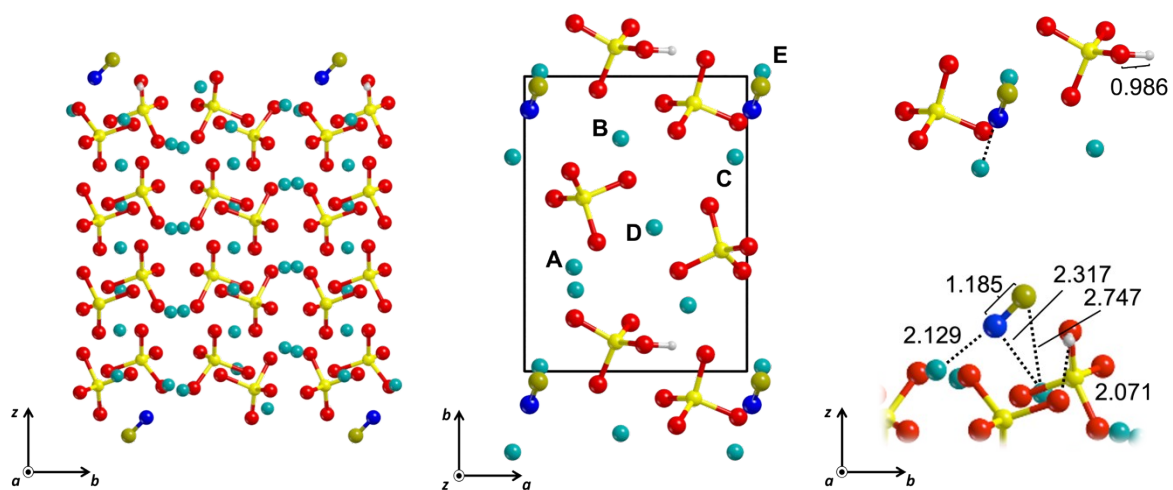

Figure S8. Side and top views of the (101) C structure. The same structure was obtained by placing the HCN molecule on the E site.

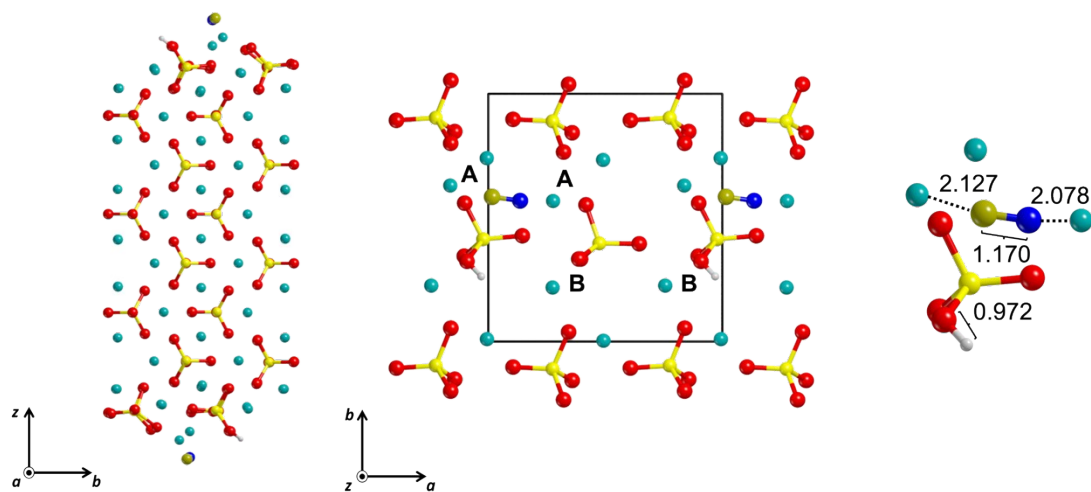

Figure S9. Side and top views of the (001) A structure.



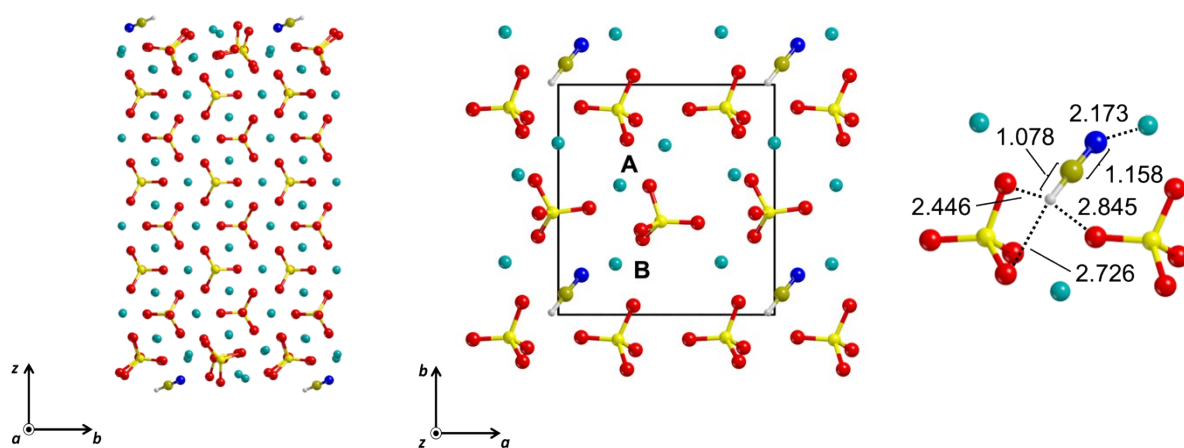

Figure S10. Side and top views of the (001) B structure.

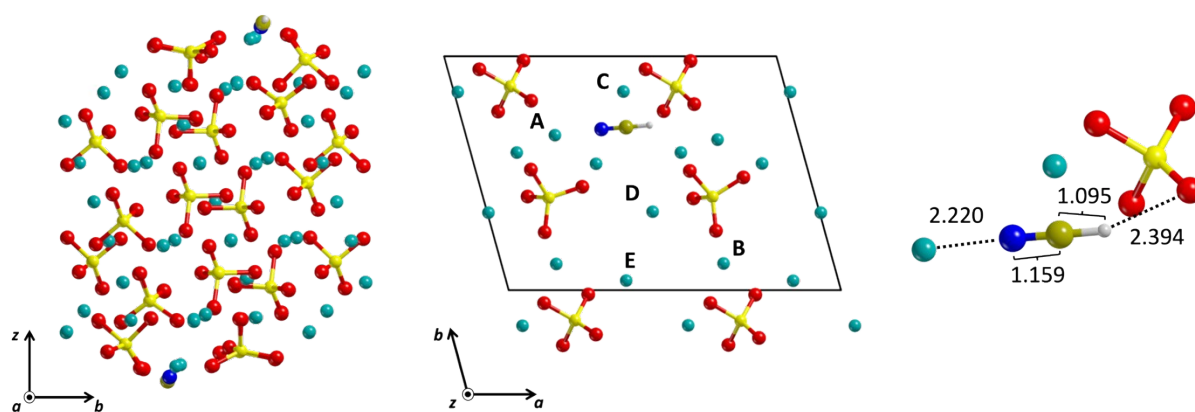

Figure S11. Side and top views of the (111) A structure.

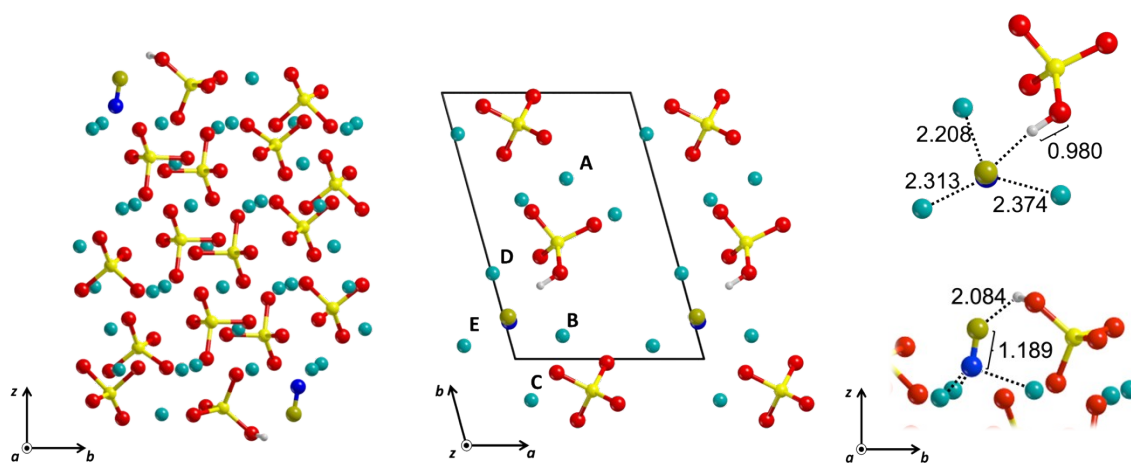

Figure S12. Side and top views of the (111) B structure.

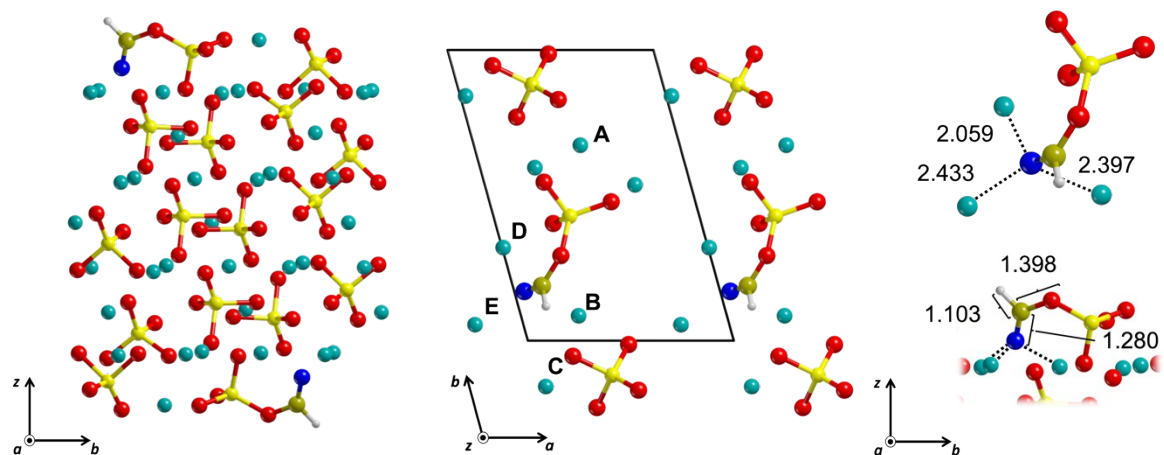

Figure S13. Side and top view of the (111) D structure. The same structure was obtained by placing the HCN molecule on the C and E sites.

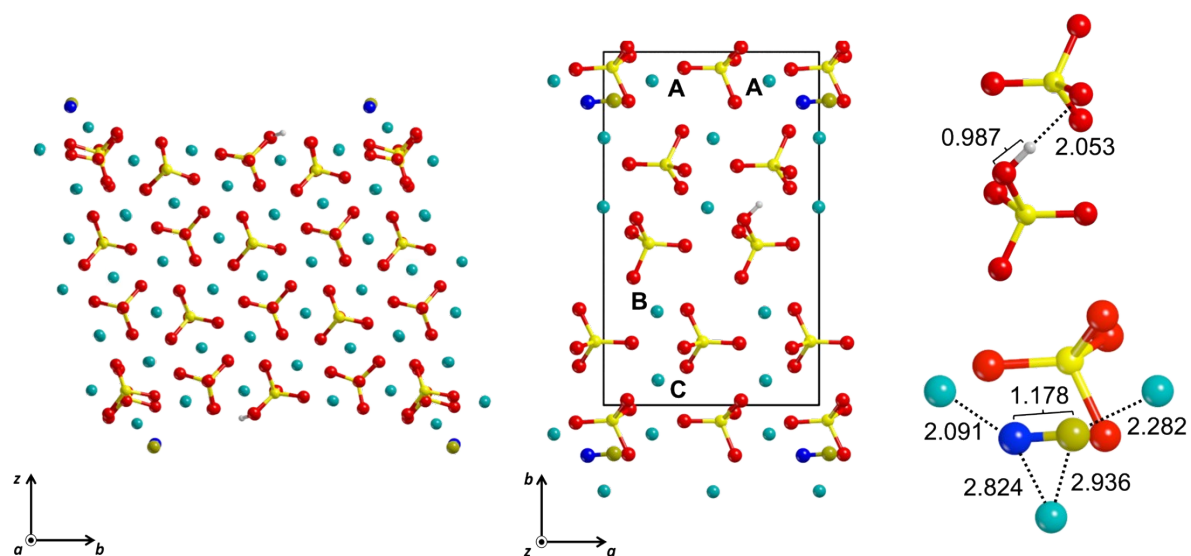

Figure S14. Side and top views of the (021) A structure.

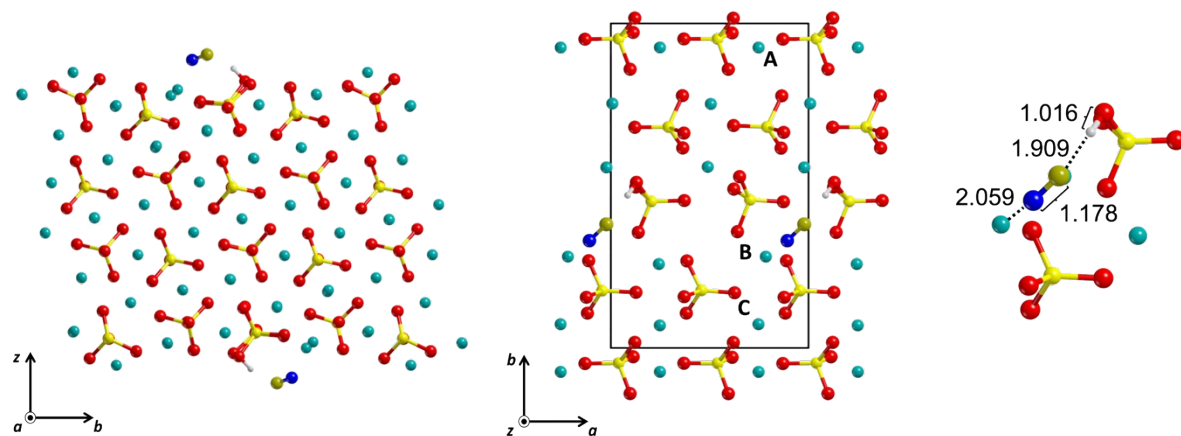

Figure S15. Side and top views of the (021) B<sub>1</sub> structure.

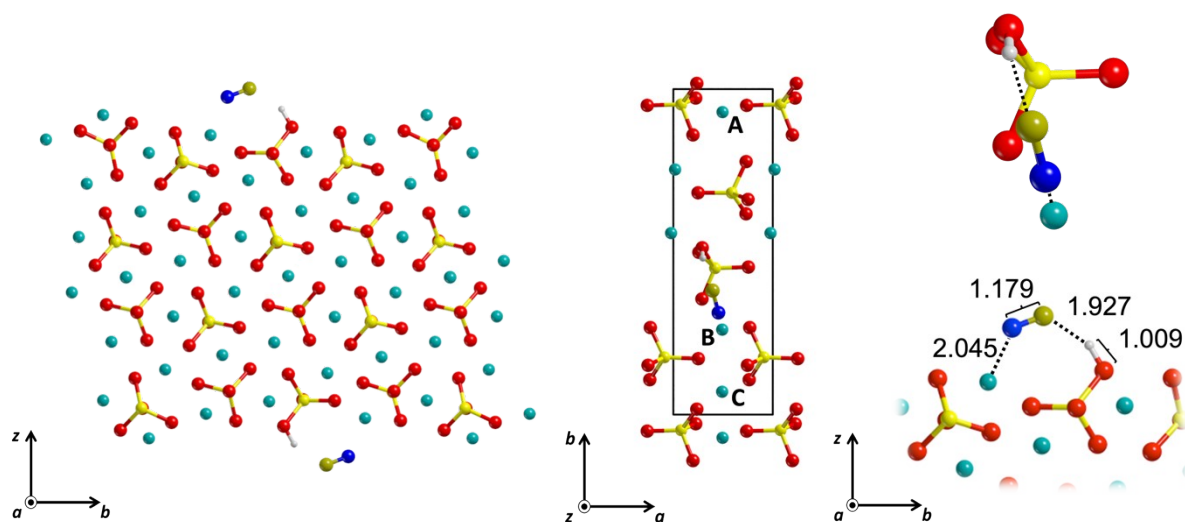

Figure S16. Side and top views of the (021) B<sub>2</sub> structure.

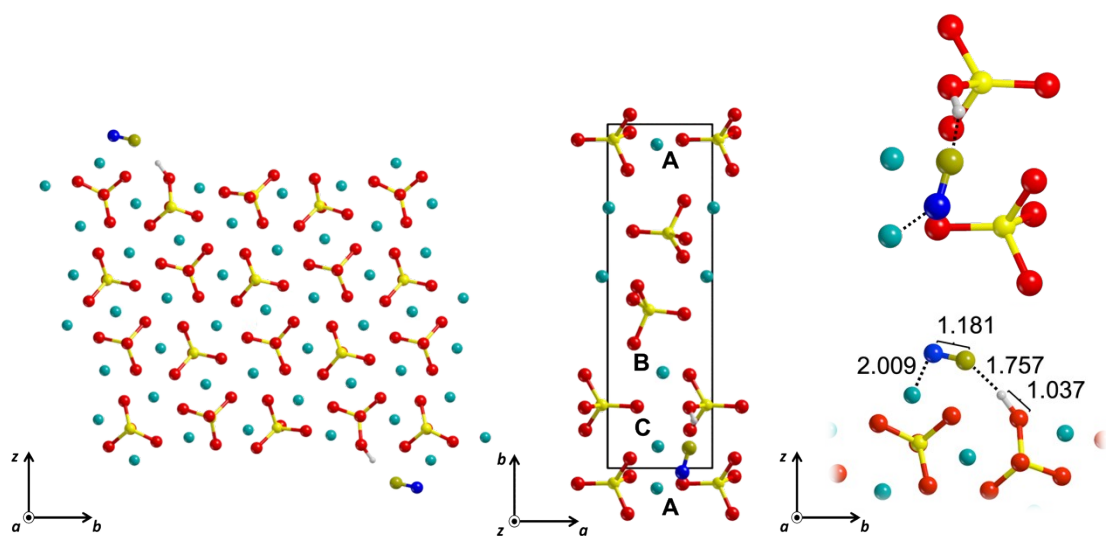

Figure S17. Side and top views of the (021) C structure. After initially placing the molecule on the C site, it displaced towards the A site during the geometry optimization.

## Activated dissociation of adsorbed HCN molecules

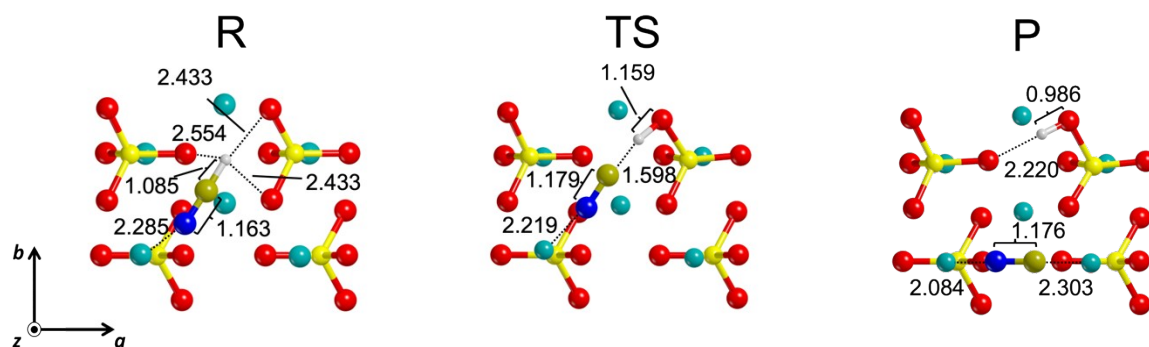

Figure S18. Reactant (R), transition state (TS) and product (P) for the activated dissociation taking place on the (010) A site.

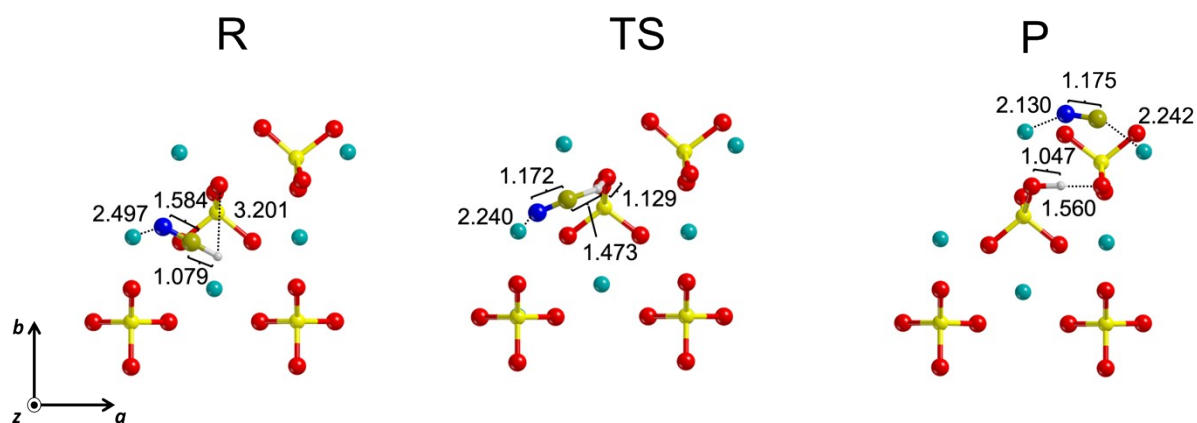

Figure S19. Reactant (R), transition state (TS) and product (P) for the activated dissociation taking place on the (120) B site.

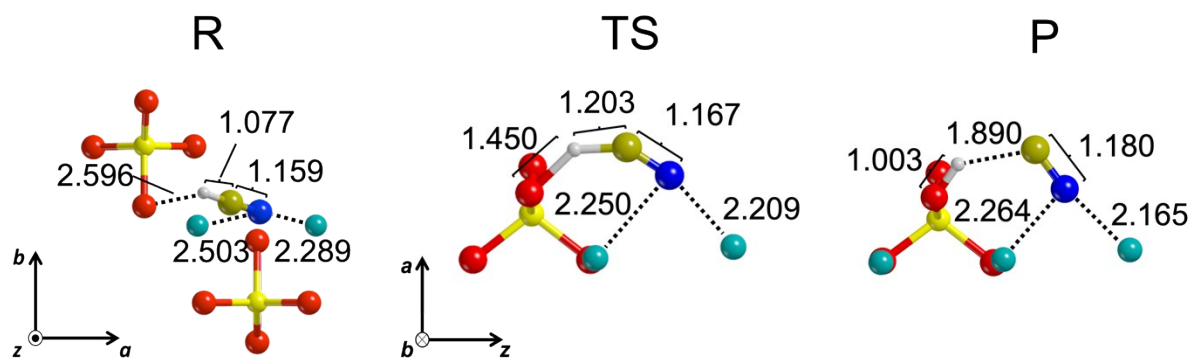

Figure S20. Reactant (R), transition state (TS) and product (P) for the activated dissociation taking place on the (120) C site.

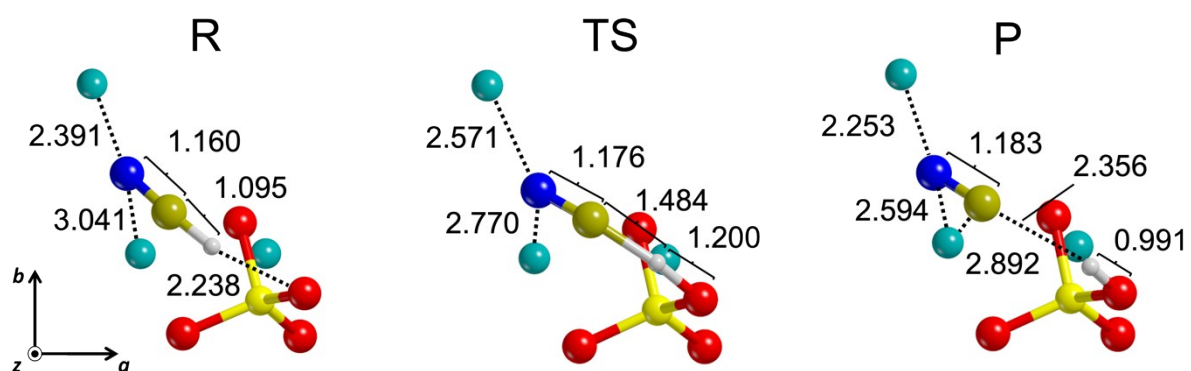

Figure S21. Reactant (R), transition state (TS) and product (P) for the activated dissociation taking place on the (101) B site.

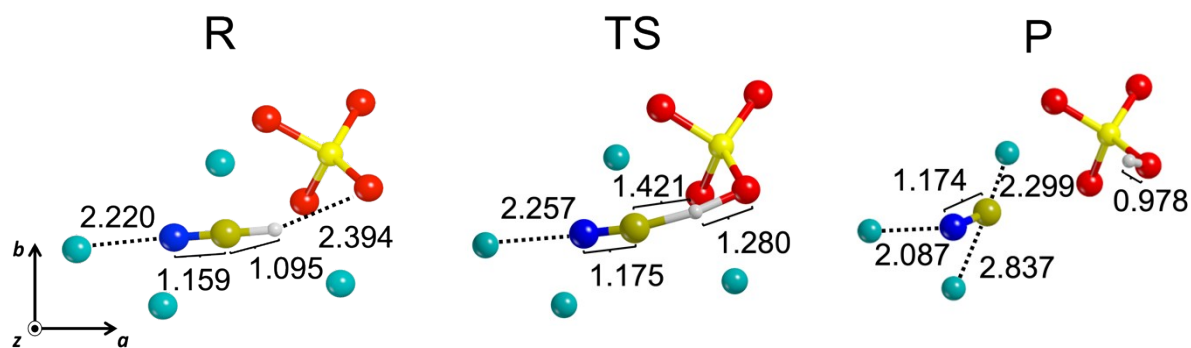

Figure S22. Reactant (R), transition state (TS) and product (P) for the activated dissociation taking place on the (111) A site.

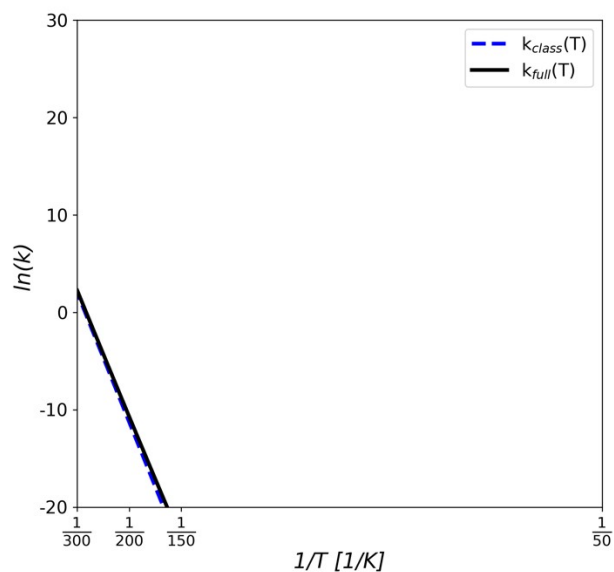

Figure S23. Calculated kinetic rate constants for the HCN dissociation from the (010) A adsorption complex. Arrhenius plot of  $k_{\text{full}}$  (black line) and  $k_{\text{class}}$  (blue dashed line) between 50 and 300 K.  $k$  units are in  $\text{s}^{-1}$ .

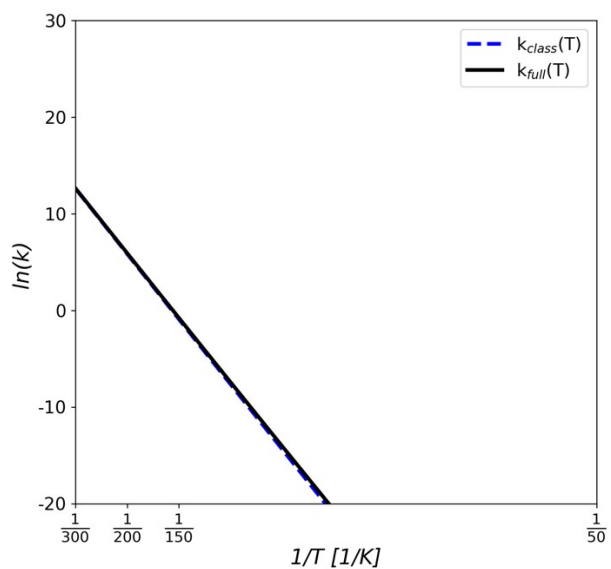

Figure S24. Calculated kinetic rate constants for the HCN dissociation from the (120) B adsorption complex. Arrhenius plot of  $k_{\text{full}}$  (black line) and  $k_{\text{class}}$  (blue dashed line) between 50 and 300 K.  $k$  units are in  $\text{s}^{-1}$ .

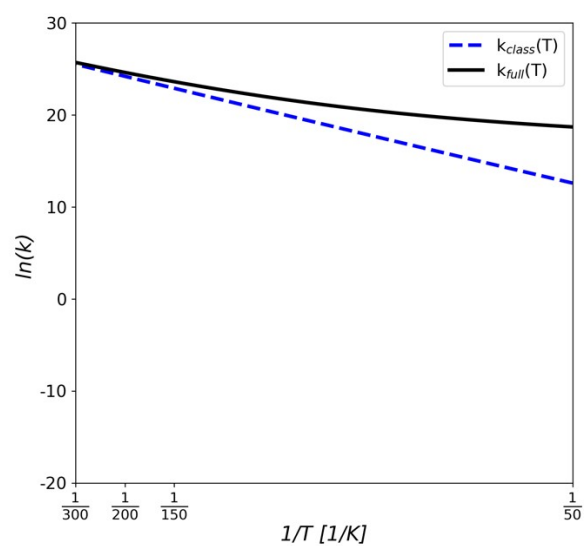

Figure S25. Calculated kinetic rate constants for the HCN dissociation from the (120) C adsorption complex. Arrhenius plot of  $k_{full}$  (black line) and  $k_{class}$  (blue dashed line) between 50 and 300 K.  $k$  units are in  $s^{-1}$ .

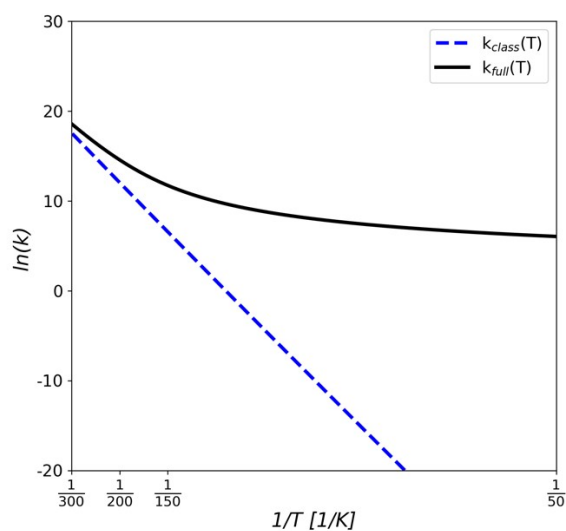

Figure S26. Calculated kinetic rate constants for the HCN dissociation from the (111) A adsorption complex. Arrhenius plot of  $k_{full}$  (black line) and  $k_{class}$  (blue dashed line) between 50 and 300 K.  $k$  units are in  $s^{-1}$ .

Table S1. Calculated rate constants excluding ( $k_{\text{class}}$ ,  $\text{s}^{-1}$ ) and including tunnelling effects ( $k_{\text{full}}$ ,  $\text{s}^{-1}$ ) and associated half-life times ( $t_{1/2}$ , s) for the HCN dissociation from different molecularly adsorption complexes considering different temperatures (T, K).

| case | (010) A           |                    |           | (120) B           |                    |           | (120) C           |                    |               | (101) B           |                    |               | (111) A           |                    |           |
|------|-------------------|--------------------|-----------|-------------------|--------------------|-----------|-------------------|--------------------|---------------|-------------------|--------------------|---------------|-------------------|--------------------|-----------|
|      | $k_{\text{full}}$ | $k_{\text{class}}$ | $t_{1/2}$ | $k_{\text{full}}$ | $k_{\text{class}}$ | $t_{1/2}$ | $k_{\text{full}}$ | $k_{\text{class}}$ | $t_{1/2}$ (s) | $k_{\text{full}}$ | $k_{\text{class}}$ | $t_{1/2}$ (s) | $k_{\text{full}}$ | $k_{\text{class}}$ | $t_{1/2}$ |
| 10   | 1.1e-45           | <1.0e-300          | 6.6e+44   | 1.2e-58           | 1.3e-163           | 6.0e+57   | 2.6e+09           | 1.8e-02            | 2.7e-10       | 5.0e-04           | 1.2e-135           | 1.4e+03       | 1.3e+02           | 2.2e-117           | 5.5e-03   |
| 50   | 5.0e-34           | 4.3e-56            | 1.4e+33   | 3.9e-23           | 6.8e-24            | 1.8e+22   | 5.1e+10           | 2.0e+09            | 1.4e-11       | 2.8e-01           | 6.3e-18            | 2.4e+00       | 3.9e+03           | 2.2e-14            | 1.8e-04   |
| 150  | 2.3e-10           | 7.5e-11            | 3.0e+09   | 1.1e+00           | 9.3e-01            | 6.5e-01   | 3.1e+11           | 1.8e+11            | 2.2e-12       | 1.6e+04           | 5.4e+02            | 4.4e-05       | 7.2e+05           | 5.0e+03            | 9.6e-07   |
| 200  | 6.3e-05           | 3.6e-05            | 1.1e+04   | 7.5e+02           | 7.0e+02            | 9.2e-04   | 4.5e+11           | 3.1e+11            | 1.6e-12       | 9.1e+05           | 1.8e+05            | 7.7e-07       | 9.3e+06           | 7.8e+05            | 7.5e-08   |
| 300  | 2.2e+01           | 1.7e+01            | 3.1e-02   | 5.3e+05           | 5.1e+05            | 1.3e-06   | 6.6e+11           | 5.5e+11            | 1.1e-12       | 1.2e+08           | 6.3e+07            | 5.8e-09       | 3.4e+08           | 1.2e+08            | 2.0e-09   |

### IR spectral features of adsorbed HCN molecules

Table S2. Structural and spectroscopic features of the 8 molecular adsorption cases (**M**). Second and third columns: computed stretching frequencies ( $\bar{\nu}$ ), and bond lengths ( $d$ ) and corresponding variations ( $\Delta$ ) for the  $\text{C}\equiv\text{N}$  and C-H bonds. Fourth: H-bond distances between the HCN and the oxygen atoms of the silicate surfaces. Fifth column: distance between the surface  $\text{Mg}^{2+}$  cations and the N-end of HCN. Last column: class to which the structure belongs according to the classification proposed in Figure 9. Frequencies are in  $\text{cm}^{-1}$  and distances in Å.

| <b>M</b> | $\text{C}\equiv\text{N}$ |                          | C-H              |                          | O $\cdots$ HCN (H – bond) |       |       | Mg - NCH          |       |       | Class |
|----------|--------------------------|--------------------------|------------------|--------------------------|---------------------------|-------|-------|-------------------|-------|-------|-------|
|          | case                     | $\bar{\nu}$ ( $\Delta$ ) | $d$ ( $\Delta$ ) | $\bar{\nu}$ ( $\Delta$ ) | $d$ ( $\Delta$ )          | $d$   |       | $d_{\text{Mg-N}}$ |       |       |       |
| (120) A  | 2019 (-78)               | 1.16001 (0.00031)        | 2702 (-609)      | 1.128 (0.052)            | 1.721                     | -     | -     | 2.098             | -     | -     | I     |
| (010) A  | 2064 (-33)               | 1.16254 (0.00284)        | 3195 (-116)      | 1.085 (0.009)            | 2.309                     | 2.433 | 2.554 | 2.185             | -     | -     | I     |
| (101) B  | 2076 (-21)               | 1.16051 (0.00081)        | 3081 (-230)      | 1.095 (0.019)            | 2.238                     | -     | -     | 2.391             | -     | -     | I     |
| (111) A  | 2092 (-5)                | 1.15897 (-0.00073)       | 3088 (-223)      | 1.095 (0.019)            | 2.394                     | -     | -     | 2.220             | -     | -     | I     |
| (120) C  | 2099 (2)                 | 1.15933 (-0.00037)       | 3305 (-6)        | 1.077 (0.001)            | 2.596                     | -     | -     | 2.289             | 2.503 | -     | II    |
| (120) B  | 2099 (2)                 | 1.15847 (-0.00123)       | 3276 (-35)       | 1.079 (0.003)            | -                         | -     | -     | 2.497             | -     | -     | II    |
| (001) B  | 2106 (9)                 | 1.15802 (-0.00168)       | 3284 (-27)       | 1.078 (0.002)            | 2.446                     | 2.726 | 2.845 | 2.173             | -     | -     | II    |
| (111) D  | 1526 (-571)              | 1.27994 (0.12024)        | 2942 (-369)      | 1.103 (0.027)            | -                         | -     | -     | 2.059             | 2.433 | 2.397 | III   |



Table S3. Structural and spectroscopic features of the 8 spontaneous dissociative adsorptions (**D**) cases. Second column: computed stretching frequencies ( $\bar{\nu}$ ) and bond lengths ( $d$ ) and corresponding variations ( $\Delta$ ) for the C $\equiv$ N bonds. Third column: computed stretching frequencies ( $\bar{\nu}$ ) and bond lengths ( $d$ ) for the O-H bonds. Fourth column: H-bond distances between the newly formed silanols and the acceptor atoms X, (X being either the C atom of a CN $^-$  or the surface O atom). Fifth column: distance between the CN $^-$  group and the surface Mg $^{2+}$  cations, ( $d_{\text{Mg-N}}$  and  $d_{\text{Mg-C}}$ ). Last column: class to which the structure belongs according to the classification proposed in Figure 9. Frequencies are in cm $^{-1}$  and distances in Å.

| <b>D</b><br>case | C $\equiv$ N             |                   | O - H       |       | X $\cdots$ HO (H-bond) | Mg - CN           |       |       |                   | <i>Class</i> |      |
|------------------|--------------------------|-------------------|-------------|-------|------------------------|-------------------|-------|-------|-------------------|--------------|------|
|                  | $\bar{\nu}$ ( $\Delta$ ) | $d$ ( $\Delta$ )  | $\bar{\nu}$ | $d$   | $d$ (C/O)              | $d_{\text{Mg-N}}$ |       |       | $d_{\text{Mg-C}}$ |              |      |
| (111) B          | 1996 (-101)              | 1.18953 (0.02983) | 3579        | 0.980 | 2.084 (C)              | 2.208             | 2.313 | 2.374 | -                 | -            | IV   |
| (101) A          | 2053 (-44)               | 1.18186 (0.02216) | 3026        | 1.009 | 1.849 (C)              | 2.008             | -     | -     | -                 | -            | V    |
| (021) C          | 2061 (-36)               | 1.18094 (0.02124) | 2585        | 1.037 | 1.757 (C)              | 2.009             | -     | -     | -                 | -            | V    |
| (101) C          | 2039 (-58)               | 1.18504 (0.02534) | 3521        | 0.986 | 2.071 (O)              | 2.129             | 2.317 | -     | 2.747             | -            | VI   |
| (021) B $_2$     | 2076 (-21)               | 1.17901 (0.01931) | 3063        | 1.009 | 1.927 (C)              | 2.045             | -     | -     | -                 | -            | V    |
| (021) A          | 2083 (-14)               | 1.17819 (0.01849) | 3475        | 0.987 | 2.053 (O)              | 2.091             | 2.824 | -     | 2.282             | 2.936        | VIII |
| (021) B $_1$     | 2086 (-11)               | 1.17817 (0.01847) | 2937        | 1.016 | 1.909 (C)              | 2.059             | -     | -     | -                 | -            | V    |
| (001) A          | 2151 (54)                | 1.16972 (0.01002) | 3752        | 0.972 | -                      | 2.078             | -     | -     | 2.127             | -            | VII  |

Table S4. Structural and spectroscopic features of the 5 manually dissociated (**MD**) cases. Second column: computed stretching frequencies ( $\bar{\nu}$ ) and bond lengths ( $d$ ) and corresponding variations ( $\Delta$ ) for the C $\equiv$ N bonds. Third column: computed stretching frequencies ( $\bar{\nu}$ ) and bond lengths ( $d$ ) for the O-H bonds. Fourth column: H-bond distances between the newly formed silanols and the acceptor atoms X (X being either the C atom of a CN $^-$  (C) or the surface O atom). Fifth column: distances between the CN $^-$  group and the surface Mg $^{2+}$  cations, ( $d_{\text{Mg-N}}$  and  $d_{\text{Mg-C}}$ ). Last column: class to which the structure belongs according to the classification proposed in Figure 9. Frequencies are in cm $^{-1}$  and distances in Å.

| <b>MD</b><br>case | C $\equiv$ N             |                   | O - H       |       | X $\cdots$ HO (H-bond) | Mg - CN           |       |                   |       | <i>Class</i> |
|-------------------|--------------------------|-------------------|-------------|-------|------------------------|-------------------|-------|-------------------|-------|--------------|
|                   | $\bar{\nu}$ ( $\Delta$ ) | $d$ ( $\Delta$ )  | $\bar{\nu}$ | $d$   | $d$ (C/O)              | $d_{\text{Mg-N}}$ |       | $d_{\text{Mg-C}}$ |       |              |
| (010) A           | 2103 (6)                 | 1.17573 (0.01603) | 3497        | 0.986 | 2.220 (O)              | 2.084             | -     | 2.303             | -     | VII          |
| (120) B           | 2109 (12)                | 1.17458 (0.01488) | 2496        | 1.047 | 1.560 (O)              | 2.130             | -     | 2.242             | -     | VII          |
| (120) C           | 2069 (-28)               | 1.17988 (0.02018) | 3146        | 1.003 | 1.890 (C)              | 2.165             | 2.264 | -                 | -     | V            |
| (101) B           | 2044 (-53)               | 1.18294 (0.02324) | 3413        | 0.991 | 2.356 (C)              | 2.253             | 2.594 | 2.892             | -     | VI           |
| (111) A           | 2114 (17)                | 1.17371 (0.01401) | 3681        | 0.978 | -                      | 2.087             | -     | 2.299             | 2.837 | VII          |

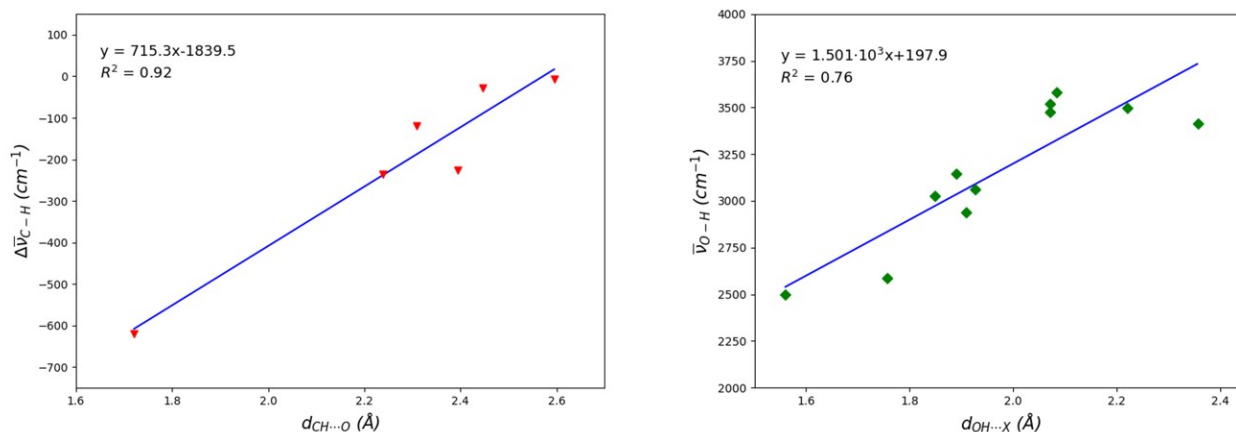

Figure S27. Left: dependence between the computed IR shifts ( $\Delta\bar{\nu}_{C-H}$ ) and the corresponding hydrogen bond distances ( $d_{CH...O}$ ) for non-dissociative adsorptions. Right: dependence between the computed IR frequency ( $\bar{\nu}_{O-H}$ ) and the corresponding hydrogen bond distance ( $d_{CH...X}$ ) for dissociative adsorptions. X represents either a C or another O atom.

## References

- 1 M. Bruno, F. R. Massaro, M. Prencipe, R. Demichelis, M. De La Pierre and F. Nestola, Ab initio calculations of the main crystal surfaces of forsterite ( $Mg_2SiO_4$ ): a preliminary study to understand the nature of geochemical processes at the olivine interface, *J. Phys. Chem. C*, 2014, **118**, 2498–2506.
- 2 A. Schäfer, H. Horn and R. Ahlrichs, Fully optimized contracted Gaussian basis sets for atoms Li to Kr, *J. Chem. Phys.*, 1992, **97**, 2571–2577.
